# Supplementary material for: Indoor Tanning Dependence in Young Adult Women
Source: Oxford University Press journal article supplement (doi:10.1158/1055-9965.epi-17-0403), 2017-10-19
Supplement: 10559965epi170403-sup-183154_3_supp_4205832_wwflfr.docx [file 10559965epi170403-sup-183154_3_supp_4205832_wwflfr.docx]

**Supplementary Material**

Supplementary Table 1. Adjusted logistic regression model of correlates of indoor tanning (IT) dependence including all variables

**Supplementary Table 1.** Adjusted logistic regression model of correlates of indoor tanning (IT) dependence including all variables

|  | **Adjusted Odds Ratio**  **(95% Confidence Interval)** | ***P*** |
| --- | --- | --- |
| **Demographics** |  |  |
| Age, y. | 1.11 (0.97, 1.26) | .124 |
| ≥ College Education | 0.71 (0.34, 1.49) | .369 |
| < College Education | Ref. |  |
| Income ≥ $50,000 | 1.34 (0.73, 2.45) | .343 |
| Income < $50,000 or Not Reported | Ref. |  |
| Season of Study Participation |  |  |
| Spring | Ref. |  |
| Summer | 1.04 (0.46, 2.38) | .993 |
| Fall | 1.23 (0.56, 2.73) | .511 |
| Winter | 0.93 (0.34, 2.55) | .728 |
| **Melanoma Risk Factors** |  |  |
| Always/Usually Burn | 0.59 (0.25, 1.39) | .230 |
| Rarely/Never Burn | Ref. |  |
| Red/Blonde Hair | 0.78 (0.40, 1.50) | .452 |
| Brown/Black Hair | Ref. |  |
| FDR w/ Melanoma | 0.69 (0.29, 1.63) | .397 |
| No FDR w/ Melanoma | Ref. |  |
| Intentional Outdoor Tanning | 1.34 (0.89, 1.54) | .167 |
| Past 12 Month Sunburns | 1.17 (0.90, 1.54) | .239 |
| **IT Behavior** |  |  |
| Age IT Initiation, y. | 0.84 (0.73, 0.97) | .014 |
| Past Year IT Frequency |  |  |
| 1 or 2 times | Ref. |  |
| 3 to 9 times | 2.09 (0.75, 5.83) | .608 |
| 10 to 19 times | 1.62 (0.53, 4.95) | .667 |
| ≥ 20 times | 3.37 (1.51, 9.88) | .022 |
| Opioid-Like IT Reactions | 1.05 (0.74, 1.48) | .786 |
| **IT Beliefs & Perceptions** |  |  |
| Benefits of IT | 2.34 (1.34, 4.07) | .003 |
| Attitudes | 1.31 (0.68, 2.53) | .416 |
| Perceived Susceptibility to Risks | 3.13 (1.8, 5.29) | <.001 |
| Perceived Severity of Risks | 0.88 (0.56, 1.37) | .560 |
| **Alcohol & Tobacco** |  |  |
| Current Cigarette Smoker | 0.57 (0.25, 1.28) | .173 |
| Non-Smoker | Ref. |  |
| Past 30 Day Binge Drinking | 0.48 (0.24, 0.96) | .038 |
| No Past 30 Day Binge Drinking | Ref. |  |
| **Psychological Risk Factors** |  |  |
| Sensation Seeking | 1.12 (0.69, 1.82) | .654 |
| Self-Esteem | 1.02 (0.96, 1.09) | .561 |
| Appearance Orientation | 1.99 (1.14, 3.46) | .015 |
| Depressive Symptoms |  |  |
| Screen - Depressive Symptoms | Ref. |  |
| Screen + Depressive Symptoms | 4.50 (2.18, 9.32) | <.001 |
| **Hosmer-Lemeshow χ2** | 6.90 (8 df) | .547 |

IT = Indoor tanning; FDR = First Degree Relative
